# Supplementary material
Source: PubMed Central journal article supplement (PMC3445981)
Supplement: EC.00069-12_zek999093958so1.pdf [file EC.00069-12_zek999093958so1.pdf]

**Table S1** Oligonucleotide primers used for qPCR

| Name   | Sequence                           |
|--------|------------------------------------|
| brlA-F | 5'-TATCCAGACATTCAAGACGCACAG-3'     |
| brlA-R | 5'-GATAATAGAGGGCAAGTTCTCCAAAG-3'   |
| abaA-F | 5'-GAGTGGCAGACCGAATGTATGTTG-3'     |
| abaA-R | 5'-TAGTGGTAGGCATTGGGTGAGTTG-3'     |
| aflA-F | 5'-CCTATAAGTGCTTCAAAGATCGTGATCG-3' |
| aflA-R | 5'-CGTACATGGATGACACGTTGTCCCAG-3'   |
| aflC-F | 5'-CCTATTCTAGCCGCCTTTCTTGAC-3'     |
| aflC-R | 5'-CATGTTGCCAGATTCCTCATATTCC-3'    |
| aflD-F | 5'-TGTATGCTCCCGTCCTACTGTTTC-3'     |
| aflD-R | 5'-TGTAGTCTCCTTAGTCGCTTCATC-3'     |
| aflM-F | 5'-GCGGAGAAAGTGGTTGAACAGATC-3'     |
| aflM-R | 5'-CAGCGAACAAAGGTGTCAATAGCC-3'     |
| aflP-F | 5'-CGATGTCTATCTTCTCCGATCTATTC-3'   |
| aflP-R | 5'-TCTCAGTCTCCAGTCTATTATCTACC-3'   |
| aflR-F | 5'-GCAACCTGATGACGACTGATATGG-3'     |
| aflR-R | 5'-TGCCAGCACCTTGAGAACGATAAG        |

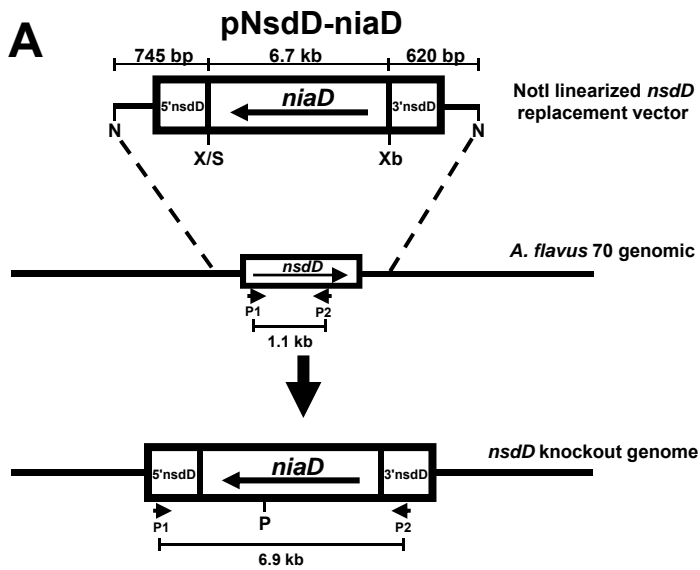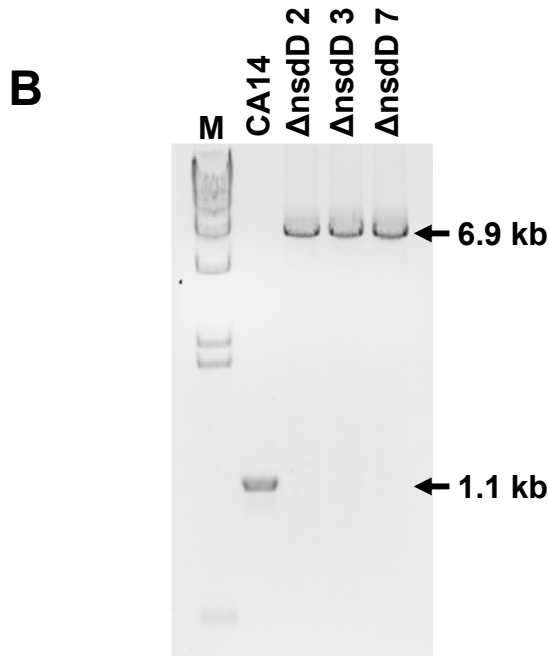

**Fig. S1.** Preparation of  $\Delta nsdD$  knockout mutants. (A) Schematic diagram of the knockout vector pNsdD-*niaD* used to generate the  $\Delta nsdD$  knockout mutants. The dashed lines show the region expected to undergo recombinational replacement of the wild-type DNA with DNA containing the *nsdD* gene disrupted by the *niaD* selectable marker gene. Direction of transcription is indicated by horizontal arrows. P1 and P2 denote oligonucleotide primers used to confirm identity of  $\Delta nsdD$  transformants by PCR of genomic DNA. The lengths of expected PCR products of either wild-type CA14 or  $\Delta nsdD$  transformant DNA are shown under horizontal lines. (B) Results of PCR of CA14 and putative  $\Delta nsdD$  transformant DNAs. Primers P1 and P2 amplification of DNA from CA14 DNA generated a product of 1.1 kb that was the expected size for the wild-type *nsdD* gene. All three of the putative  $\Delta nsdD$  mutants demonstrated a product of 6.9 kb that was of the expected size for recombinational inactivation of the *nsdD* gene by the pNsdD-*niaD* plasmid.

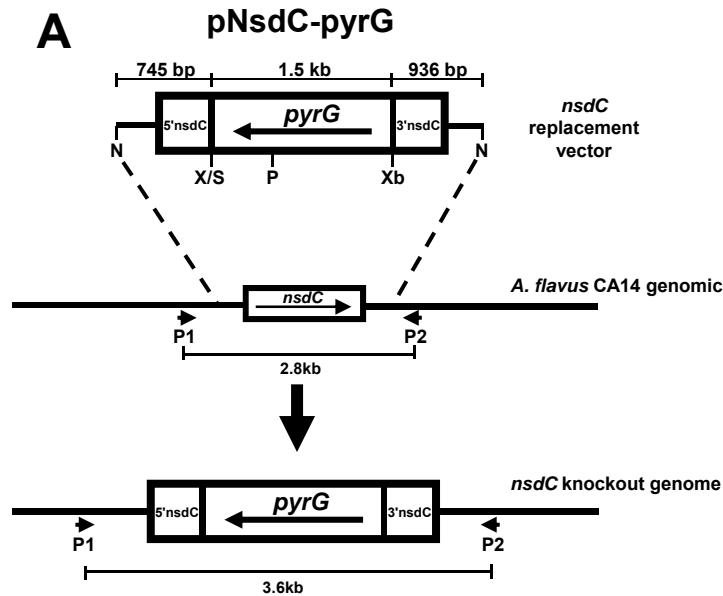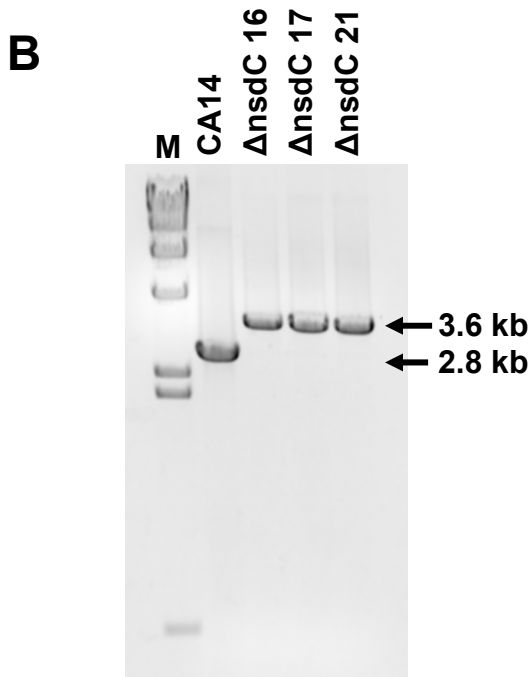

**Fig. S2.** Preparation of  $\Delta nsdC$  knockout mutants. (A) Schematic diagram of the knockout vector pNsdC-pyrG used to generate the  $\Delta nsdC$  knockout mutants. The dashed lines show the region expected to undergo recombinational replacement of the wild-type DNA with DNA containing the *nsdC* gene disrupted by the *pyrG* selectable marker gene. Direction of transcription is indicated by horizontal arrows. P1 and P2 denote oligonucleotide primers used to confirm identity of  $\Delta nsdC$  transformants by PCR of genomic DNA. The lengths of expected PCR products of either wild-type CA14 or  $\Delta nsdC$  transformant DNA are shown under horizontal lines. (B) Results of PCR of CA14 and putative  $\Delta nsdC$  transformant DNAs. Primers P1 and P2 amplification of DNA from CA14 DNA generated a product of 2.8 kb that was the expected size for the wild-type *nsdC* gene. All three of the putative  $\Delta nsdC$  mutants demonstrated a product of 3.6 kb that was of the expected size for recombinational inactivation of the *nsdC* gene by the pNsdC-pyrG plasmid.

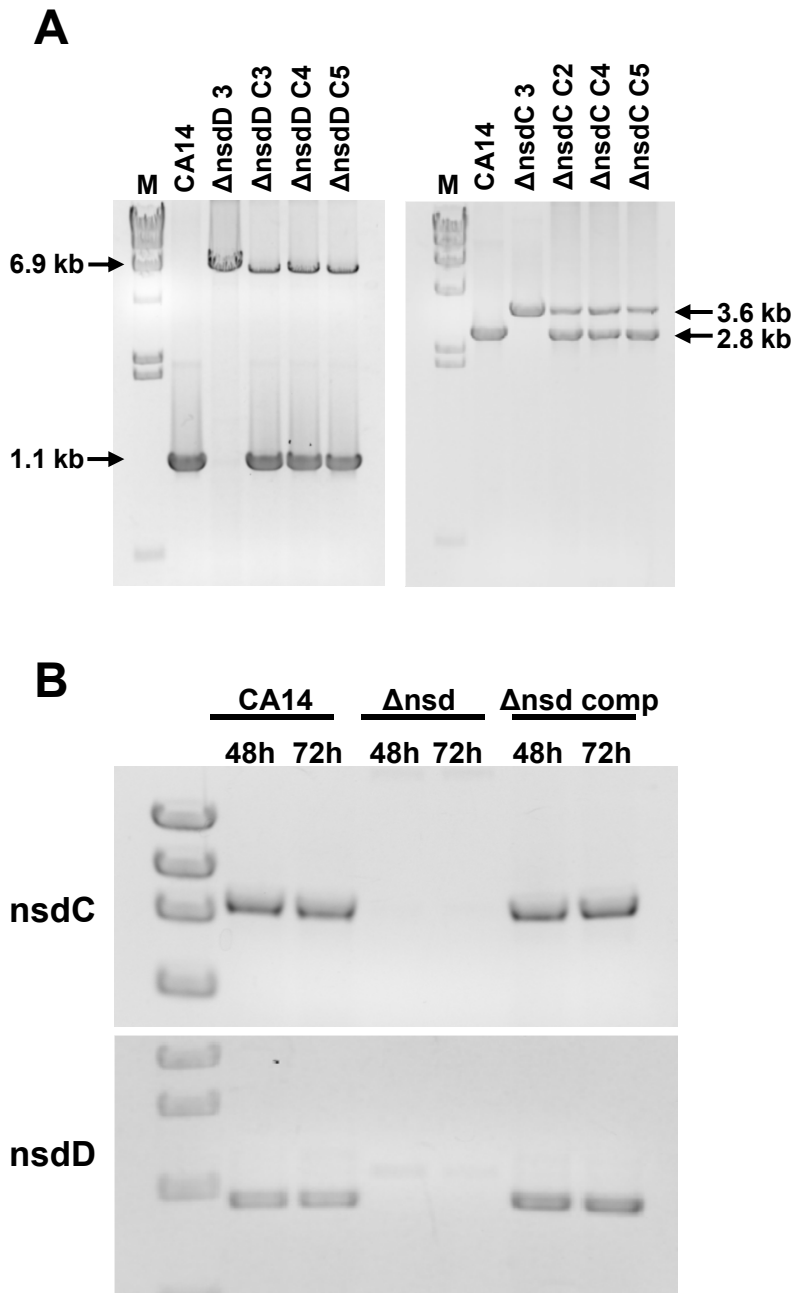

**Fig. S3.** PCR and RT-PCR analysis of  $\Delta nsd$  complementation strains. (A) Results of PCR of genomic DNAs from the wild-type CA14,  $\Delta nsd$  mutants, and  $\Delta nsd$  complementation (comp) strains. All three of the  $\Delta nsdD$  and  $\Delta nsdC$  complementation strains demonstrated PCR products of 1.1 kb and 2.8 kb respectively, as was observed for the wild-type CA14 amplification product. (B) Expression of *nsdC* and *nsdD* from 48 and 72 h cultures of the CA14,  $\Delta nsd$  mutants, and  $\Delta nsdC$  C5 and  $\Delta nsdD$  C4 complementation strains. Results of RT-PCR demonstrate that the  $\Delta nsd$  complementation strains are generating their respective *nsd* transcripts as observed from PCR of the CA14 but not the  $\Delta nsd$  mutant cDNAs.

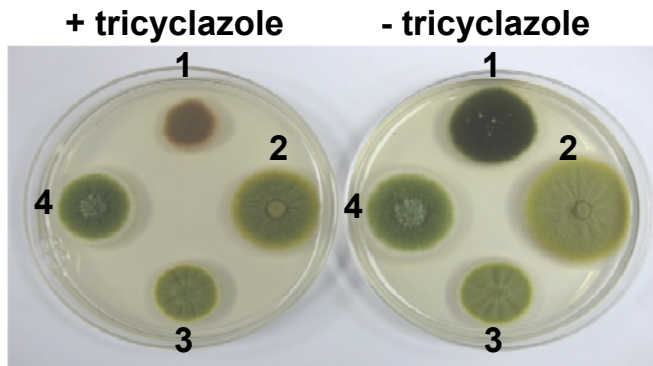

**Fig. S4.** Effect of the melanin biosynthesis inhibitor, tricyclazole, on pigment production in the  $\Delta nsd$  mutants. 1) *A. alternata*; 2) CA14  $\Delta nsdC$  17; 3) CA14  $\Delta nsdD$  3; 4) CA14. Spores of the wild-type CA14,  $\Delta nsdC$  17 and  $\Delta nsdD$  3 mutants, and *Alternaria alternata* were point inoculated onto YGT-U agar supplemented with 100  $\mu\text{g/ml}$  tricyclazole. Plates were incubated for 5 days at 30°C under illumination. Note that there is no significant change of pigmentation of the CA14 or  $\Delta nsd$  strains in the presence of tricyclazole. However the *A. alternata* colony pigmentation has been altered from a black to reddish-brown color indicative of inhibition of melanin biosynthesis.

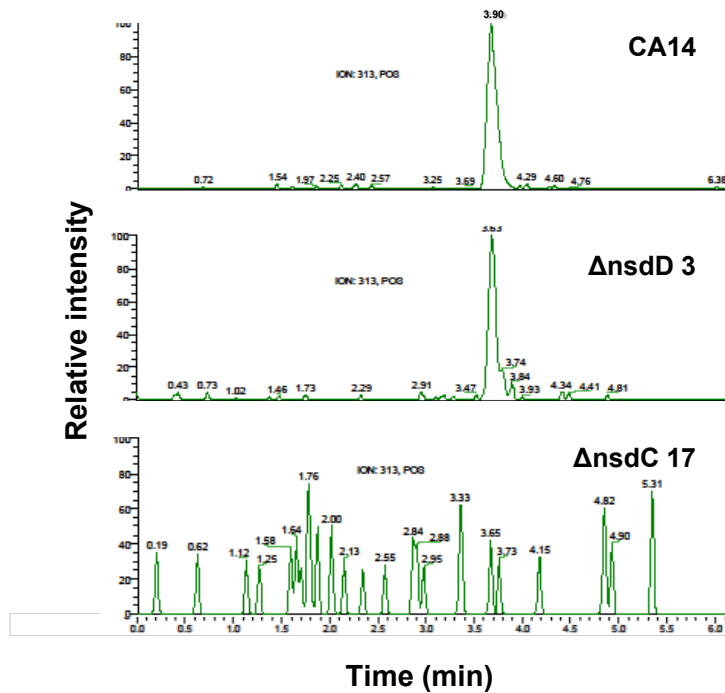

**Fig. S5.** LC/MS results confirming that little to no AFB1 ( $m/z=313$  positive ion and  $m/z$  311 neg ion) is present in extracts of the  $\Delta nsdC$  strain but is present in the  $\Delta nsdD$  mutant and the wild-type *A. flavus* CA14.
